# Supplementary material for: Long-term memory for a learned behaviour in a wild bird
Source: Biol Lett. 2020 Feb 12;16(2):20190912. doi: 10.1098/rsbl.2019.0912 (PMC7058958; doi:10.1098/rsbl.2019.0912)
Supplement: Dataset [file rsbl20190912supp3.csv]

Name	Bands	Sex	Cohort	Age	Experience group	Date last open	Date last seen	Test date	Days since last open	Days since last seen	Total trials	Trial no.	Time to 1st worm	Pecks to 1st worm	Total pecks	No. lids opened	Solve		Data supporting: Shaw RC, Harvey A. Long term memory for a learned behaviour in a wild bird. Biology Letters
Inammed	pBM-GY	F	2015	3	0	NA	16/12/2016	22/01/2018	NA	402	3	1	NA	NA	0	0	0
Inammed	pBM-GY	F	2015	3	0	NA	16/12/2016	22/01/2018	NA	402	3	2	NA	NA	0	0	0
Inammed	pBM-GY	F	2015	3	0	NA	16/12/2016	22/01/2018	NA	402	3	3	NA	NA	0	0	0
Fonz	GW-YM	M	2013	5	1	3/03/2017	3/03/2017	22/01/2018	325	325	3	1	3	1	6	2	1
Fonz	GW-YM	M	2013	5	1	3/03/2017	3/03/2017	22/01/2018	325	325	3	2	3	3	10	2	1
Fonz	GW-YM	M	2013	5	1	3/03/2017	3/03/2017	22/01/2018	325	325	3	3	3	4	6	2	1
John Doe	RM-YdB	M	2017	1	0	NA	NA	22/01/2018	NA	NA	1	1	NA	NA	0	0	0
Optimus Prime	pBR-YM	M	2014	4	1	14/06/2016	14/06/2016	22/01/2018	587	587	3	1	2	1	6	2	1
Optimus Prime	pBR-YM	M	2014	4	1	14/06/2016	14/06/2016	22/01/2018	587	587	3	2	4	3	13	2	1
Optimus Prime	pBR-YM	M	2014	4	1	14/06/2016	14/06/2016	22/01/2018	587	587	3	3	4	4	21	2	1
Spark	GpB-GM	M	2015	3	1	7/06/2016	7/06/2016	23/01/2018	595	595	3	1	3	1	6	2	1
Spark	GpB-GM	M	2015	3	1	7/06/2016	7/06/2016	23/01/2018	595	595	3	2	5	4	13	2	1
Spark	GpB-GM	M	2015	3	1	7/06/2016	7/06/2016	23/01/2018	595	595	3	3	3	2	3	2	1
James	fPG-pBM	M	2016	2	1	1/02/2017	1/02/2017	24/01/2018	357	357	3	1	8	2	7	2	1
James	fPG-pBM	M	2016	2	1	1/02/2017	1/02/2017	24/01/2018	357	357	3	2	4	2	3	2	1
James	fPG-pBM	M	2016	2	1	1/02/2017	1/02/2017	24/01/2018	357	357	3	3	4	2	4	2	1
Patrick	fPR-GM	M	2015	3	1	21/12/2016	21/12/2016	24/01/2018	399	399	3	1	1	2	5	2	1
Patrick	fPR-GM	M	2015	3	1	21/12/2016	21/12/2016	24/01/2018	399	399	3	2	2	2	7	2	1
Patrick	fPR-GM	M	2015	3	1	21/12/2016	21/12/2016	24/01/2018	399	399	3	3	2	1	9	2	1
Errol	YM-YB	M	2013	5	1	15/03/2017	15/03/2017	24/01/2018	315	315	3	1	2	1	3	2	1
Errol	YM-YB	M	2013	5	1	15/03/2017	15/03/2017	24/01/2018	315	315	3	2	3	1	4	2	1
Errol	YM-YB	M	2013	5	1	15/03/2017	15/03/2017	24/01/2018	315	315	3	3	5	2	7	2	1
Bella	YM-pBR	F	2015	3	0	NA	24/02/2017	27/01/2018	NA	337	3	1	NA	NA	0	0	0
Bella	YM-pBR	F	2015	3	0	NA	24/02/2017	27/01/2018	NA	337	3	2	NA	NA	0	0	0
Bella	YM-pBR	F	2015	3	0	NA	24/02/2017	27/01/2018	NA	337	3	3	NA	NA	0	0	0
Orion	pBR-pBM	M	2016	2	1	14/06/2016	14/06/2016	27/01/2018	592	592	3	1	38	2	7	2	1
Orion	pBR-pBM	M	2016	2	1	14/06/2016	14/06/2016	27/01/2018	592	592	3	2	3	2	19	2	1
Orion	pBR-pBM	M	2016	2	1	14/06/2016	14/06/2016	27/01/2018	592	592	3	3	2	2	19	2	1
Fitz	YpB-YM	F	2013	5	1	19/06/2016	19/06/2016	27/01/2018	587	587	3	1	3	1	2	2	1
Fitz	YpB-YM	F	2013	5	1	19/06/2016	19/06/2016	27/01/2018	587	587	3	2	1	1	2	2	1
Fitz	YpB-YM	F	2013	5	1	19/06/2016	19/06/2016	27/01/2018	587	587	3	3	1	1	4	2	1
Buddy	BfP-YM	M	2014	4	0	NA	NA	28/01/2018	NA	NA	3	1	NA	NA	0	0	0
Buddy	BfP-YM	M	2014	4	0	NA	NA	28/01/2018	NA	NA	3	2	NA	NA	0	0	0
Buddy	BfP-YM	M	2014	4	0	NA	NA	28/01/2018	NA	NA	3	3	NA	NA	0	0	0
Edison	BB-YM	M	2013	5	1	29/06/2016	29/06/2016	28/01/2018	578	578	3	1	7	4	10	2	1
Edison	BB-YM	M	2013	5	1	29/06/2016	29/06/2016	28/01/2018	578	578	3	2	1	1	19	2	1
Edison	BB-YM	M	2013	5	1	29/06/2016	29/06/2016	28/01/2018	578	578	3	3	1	1	3	2	1
Gramps	BM-YW	M	2010	8	1	26/12/2016	26/12/2016	28/01/2018	398	398	3	1	4	3	5	2	1
Gramps	BM-YW	M	2010	8	1	26/12/2016	26/12/2016	28/01/2018	398	398	3	2	1	2	5	2	1
Gramps	BM-YW	M	2010	8	1	26/12/2016	26/12/2016	28/01/2018	398	398	3	3	4	2	4	2	1
Donatello	YM-fPG	M	2014	4	1	30/12/2016	30/12/2016	28/01/2018	394	394	3	1	2	1	2	2	1
Donatello	YM-fPG	M	2014	4	1	30/12/2016	30/12/2016	28/01/2018	394	394	3	2	2	1	5	2	1
Donatello	YM-fPG	M	2014	4	1	30/12/2016	30/12/2016	28/01/2018	394	394	3	3	2	1	6	2	1
Gobbler	BR-GM	M	2015	3	1	27/12/2016	27/12/2016	29/01/2018	398	398	3	1	4	2	8	2	1
Gobbler	BR-GM	M	2015	3	1	27/12/2016	27/12/2016	29/01/2018	398	398	3	2	3	1	4	2	1
Gobbler	BR-GM	M	2015	3	1	27/12/2016	27/12/2016	29/01/2018	398	398	3	3	4	1	8	2	1
Cat	RW-YM	F	2014	4	1	6/07/2015	3/03/2017	29/01/2018	938	332	3	1	NA	NA	0	0	0
Cat	RW-YM	F	2014	4	1	6/07/2015	3/03/2017	29/01/2018	938	332	3	2	NA	NA	0	0	0
Cat	RW-YM	F	2014	4	1	6/07/2015	3/03/2017	29/01/2018	938	332	3	3	NA	NA	0	0	0
Daphne	YM-XX	F	2014	4	1	22/03/2017	22/03/2017	29/01/2018	313	313	3	1	12	2	6	2	1
Daphne	YM-XX	F	2014	4	1	22/03/2017	22/03/2017	29/01/2018	313	313	3	2	3	1	3	2	1
Daphne	YM-XX	F	2014	4	1	22/03/2017	22/03/2017	29/01/2018	313	313	3	3	7	3	8	2	1
Cooper	pBW-pBM	M	2016	2	1	14/06/2016	14/06/2016	29/01/2018	594	594	3	1	5	3	8	2	1
Cooper	pBW-pBM	M	2016	2	1	14/06/2016	14/06/2016	29/01/2018	594	594	3	2	2	1	7	2	1
Cooper	pBW-pBM	M	2016	2	1	14/06/2016	14/06/2016	29/01/2018	594	594	3	3	2	1	4	2	1
Shadow	fPY-YM	M	2013	5	1	10/03/2017	10/03/2017	29/01/2018	325	325	3	1	4	1	2	2	1
Shadow	fPY-YM	M	2013	5	1	10/03/2017	10/03/2017	29/01/2018	325	325	3	2	8	3	5	2	1
Shadow	fPY-YM	M	2013	5	1	10/03/2017	10/03/2017	29/01/2018	325	325	3	3	1	1	2	2	1
Mac	OM-YW	F	2007	11	1	20/06/2016	20/06/2016	30/01/2018	589	589	3	1	8	4	8	2	1
Mac	OM-YW	F	2007	11	1	20/06/2016	20/06/2016	30/01/2018	589	589	3	2	2	1	4	2	1
Mac	OM-YW	F	2007	11	1	20/06/2016	20/06/2016	30/01/2018	589	589	3	3	20	3	12	2	1
Cheese	fPM-YpB	M	2008	10	1	15/03/2017	15/03/2017	30/01/2018	321	321	3	1	NA	NA	0	0	0
Cheese	fPM-YpB	M	2008	10	1	15/03/2017	15/03/2017	30/01/2018	321	321	3	2	NA	NA	1	0	0
Cheese	fPM-YpB	M	2008	10	1	15/03/2017	15/03/2017	30/01/2018	321	321	3	3	NA	NA	0	0	0
Champ	KM-RY	M	2011	7	1	28/06/2016	28/06/2016	30/01/2018	581	581	3	1	17	5	10	1	1
Champ	KM-RY	M	2011	7	1	28/06/2016	28/06/2016	30/01/2018	581	581	3	2	5	1	9	2	1
Champ	KM-RY	M	2011	7	1	28/06/2016	28/06/2016	30/01/2018	581	581	3	3	2	1	4	2	1
Marty	YfP-YM	M	2013	5	1	30/01/2017	30/01/2017	30/01/2018	365	365	3	1	5	1	3	2	1
Marty	YfP-YM	M	2013	5	1	30/01/2017	30/01/2017	30/01/2018	365	365	3	2	4	1	2	2	1
Marty	YfP-YM	M	2013	5	1	30/01/2017	30/01/2017	30/01/2018	365	365	3	3	6	1	4	2	1
FitzPat Jr	GR-pGM	M	2018	0.5	0	NA	NA	30/01/2018	NA	NA	3	1	NA	NA	0	0	0
FitzPat Jr	GR-pGM	M	2018	0.5	0	NA	NA	30/01/2018	NA	NA	3	2	NA	NA	0	0	0
FitzPat Jr	GR-pGM	M	2018	0.5	0	NA	NA	30/01/2018	NA	NA	3	3	NA	NA	0	0	0
Hansel	RM-GY	M	2017	1	0	NA	19/12/2016	30/01/2018	NA	407	3	1	NA	NA	0	0	0
Hansel	RM-GY	M	2017	1	0	NA	19/12/2016	30/01/2018	NA	407	3	2	NA	NA	0	0	0
Hansel	RM-GY	M	2017	1	0	NA	19/12/2016	30/01/2018	NA	407	3	3	224	1	1	1	0
Jet	W(pB)-YM	M	2013	5	1	1/03/2017	1/03/2017	31/01/2018	336	336	3	1	5	2	5	2	1
Jet	W(pB)-YM	M	2013	5	1	1/03/2017	1/03/2017	31/01/2018	336	336	3	2	2	3	11	2	1
Jet	W(pB)-YM	M	2013	5	1	1/03/2017	1/03/2017	31/01/2018	336	336	3	3	4	3	5	2	1
Tui	pBM-fPG	M	2016	2	1	27/02/2017	27/02/2017	31/01/2018	338	338	3	1	2	2	4	2	1
Tui	pBM-fPG	M	2016	2	1	27/02/2017	27/02/2017	31/01/2018	338	338	3	2	1	1	2	2	1
Tui	pBM-fPG	M	2016	2	1	27/02/2017	27/02/2017	31/01/2018	338	338	3	3	1	1	4	2	1
Machiavelli	RM-fPG	M	2017	1	0	NA	NA	23/02/2018	NA	NA	3	1	NA	NA	0	0	0
Machiavelli	RM-fPG	M	2017	1	0	NA	NA	23/02/2018	NA	NA	3	2	NA	NA	0	0	0
Machiavelli	RM-fPG	M	2017	1	0	NA	NA	23/02/2018	NA	NA	3	3	NA	NA	0	0	0
Henry	WR-YM	M	2013	5	1	1/03/2017	1/03/2017	23/02/2018	359	359	1	1	2	2	6	2	1
Cersei	GM-YR	F	2015	3	1	29/12/2016	29/12/2016	19/04/2018	476	476	3	1	4	1	2	2	1
Cersei	GM-YR	F	2015	3	1	29/12/2016	29/12/2016	19/04/2018	476	476	3	2	15	1	2	2	1
Cersei	GM-YR	F	2015	3	1	29/12/2016	29/12/2016	19/04/2018	476	476	3	3	5	1	2	2	1
Bingley	(pBY)-YM	F	2013	5	1	13/01/2017	13/01/2017	19/04/2018	461	461	3	1	31	2	6	2	1
Bingley	(pBY)-YM	F	2013	5	1	13/01/2017	13/01/2017	19/04/2018	461	461	3	2	6	2	3	2	1
Bingley	(pBY)-YM	F	2013	5	1	13/01/2017	13/01/2017	19/04/2018	461	461	3	3	8	3	5	2	1
Beebe	YM-RW	F	2014	4	1	15/06/2016	15/06/2016	19/04/2018	673	673	3	1	9	2	3	2	1
Beebe	YM-RW	F	2014	4	1	15/06/2016	15/06/2016	19/04/2018	673	673	3	2	2	1	2	2	1
Beebe	YM-RW	F	2014	4	1	15/06/2016	15/06/2016	19/04/2018	673	673	3	3	6	2	3	2	1
Georgie	BW-pBM	F	2016	2	1	6/06/2016	6/06/2016	20/04/2018	683	683	3	1	128	1	2	2	1
Georgie	BW-pBM	F	2016	2	1	6/06/2016	6/06/2016	20/04/2018	683	683	3	2	13	2	2	1	1
Georgie	BW-pBM	F	2016	2	1	6/06/2016	6/06/2016	20/04/2018	683	683	3	3	8	2	3	2	1
Pepper	pBM-WY	F	2016	2	1	31/12/2016	31/12/2016	20/04/2018	475	475	3	1	10	3	61	2	1
Pepper	pBM-WY	F	2016	2	1	31/12/2016	31/12/2016	20/04/2018	475	475	3	2	5	1	6	2	1
Pepper	pBM-WY	F	2016	2	1	31/12/2016	31/12/2016	20/04/2018	475	475	3	3	5	2	5	2	1
Scooby	RY-M	M	2013	5	1	14/06/2016	14/06/2016	24/04/2018	679	679	3	1	1	1	7	2	1
Scooby	RY-M	M	2013	5	1	14/06/2016	14/06/2016	24/04/2018	679	679	3	2	2	1	6	2	1
Scooby	RY-M	M	2013	5	1	14/06/2016	14/06/2016	24/04/2018	679	679	3	3	3	2	8	2	1
Huia	pBM-RfP	F	2016	2	1	13/06/2016	13/06/2016	24/04/2018	680	680	3	1	23	1	5	2	1
Huia	pBM-RfP	F	2016	2	1	13/06/2016	13/06/2016	24/04/2018	680	680	3	2	4	1	15	2	1
Huia	pBM-RfP	F	2016	2	1	13/06/2016	13/06/2016	24/04/2018	680	680	3	3	2	1	5	2	1
April	YM-RG	F	2014	4	1	27/02/2017	27/02/2017	24/04/2018	421	421	3	1	12	1	6	2	1
April	YM-RG	F	2014	4	1	27/02/2017	27/02/2017	24/04/2018	421	421	3	2	2	2	8	2	1
April	YM-RG	F	2014	4	1	27/02/2017	27/02/2017	24/04/2018	421	421	3	3	25	4	11	2	1
Marvel	YM-WG	F	2014	4	1	13/12/2016	13/12/2016	24/04/2018	497	497	3	1	1	1	14	2	1
Marvel	YM-WG	F	2014	4	1	13/12/2016	13/12/2016	24/04/2018	497	497	3	2	1	1	8	1	1
Marvel	YM-WG	F	2014	4	1	13/12/2016	13/12/2016	24/04/2018	497	497	3	3	2	2	5	2	1
Cash	KM-OO	M	2014	6	0	NA	NA	9/10/2019	NA	NA	3	1	NA	NA	0	0	0
Cash	KM-OO	M	2014	6	0	NA	NA	9/10/2019	NA	NA	3	2	NA	NA	0	0	0
Cash	KM-OO	M	2014	6	0	NA	NA	9/10/2019	NA	NA	3	3	NA	NA	0	0	0
Robbie	RM-pBK	M	2017	3	0	NA	19/12/2016	9/10/2019	NA	1024	3	1	NA	NA	0	0	0
Robbie	RM-pBK	M	2017	3	0	NA	19/12/2016	9/10/2019	NA	1024	3	2	NA	NA	0	0	0
Robbie	RM-pBK	M	2017	3	0	NA	19/12/2016	9/10/2019	NA	1024	3	3	NA	NA	0	0	0
Ace	BG-pGM	M	2018	2	0	NA	NA	10/10/2019	NA	NA	3	1	NA	NA	0	0	0
Ace	BG-pGM	M	2018	2	0	NA	NA	10/10/2019	NA	NA	3	2	NA	NA	3	0	0
Ace	BG-pGM	M	2018	2	0	NA	NA	10/10/2019	NA	NA	3	3	NA	NA	0	0	0
Clive	RM-BG	M	2017	3	0	NA	19/12/2016	10/10/2019	NA	1025	3	1	NA	NA	0	0	0
Clive	RM-BG	M	2017	3	0	NA	19/12/2016	10/10/2019	NA	1025	3	2	NA	NA	0	0	0
Clive	RM-BG	M	2017	3	0	NA	19/12/2016	10/10/2019	NA	1025	3	3	NA	NA	1	0	0
Madonna	pBM-WK	F	2016	4	0	NA	15/03/2017	10/10/2019	NA	939	3	1	NA	NA	0	0	0
Madonna	pBM-WK	F	2016	4	0	NA	15/03/2017	10/10/2019	NA	939	3	2	NA	NA	0	0	0
Madonna	pBM-WK	F	2016	4	0	NA	15/03/2017	10/10/2019	NA	939	3	3	NA	NA	0	0	0
Vince	RY-RM	M	2016	4	0	NA	NA	10/10/2019	NA	NA	3	1	NA	NA	0	0	0
Vince	RY-RM	M	2016	4	0	NA	NA	10/10/2019	NA	NA	3	2	NA	NA	0	0	0
Vince	RY-RM	M	2016	4	0	NA	NA	10/10/2019	NA	NA	3	3	NA	NA	0	0	0
Sarabi	YM-pB	F	2014	6	0	NA	27/01/2017	13/10/2019	NA	989	3	1	NA	NA	0	0	0
Sarabi	YM-pB	F	2014	6	0	NA	27/01/2017	13/10/2019	NA	989	3	2	NA	NA	0	0	0
Sarabi	YM-pB	F	2014	6	0	NA	27/01/2017	13/10/2019	NA	989	3	3	NA	NA	0	0	0
Jay	RM-RpB	M	2017	3	0	NA	NA	21/10/2019	NA	NA	3	1	NA	NA	0	0	0
Jay	RM-RpB	M	2017	3	0	NA	NA	21/10/2019	NA	NA	3	2	NA	NA	0	0	0
Jay	RM-RpB	M	2017	3	0	NA	NA	21/10/2019	NA	NA	3	3	NA	NA	0	0	0
Buller	fPfP-pBM	M	2016	4	0	NA	30/12/2016	21/10/2019	NA	1025	3	1	NA	NA	0	0	0
Buller	fPfP-pBM	M	2016	4	0	NA	30/12/2016	21/10/2019	NA	1025	3	2	NA	NA	0	0	0
Buller	fPfP-pBM	M	2016	4	0	NA	30/12/2016	21/10/2019	NA	1025	3	3	NA	NA	0	0	0
Mayhem	GB-RM	F	2017	3	0	NA	NA	21/10/2019	NA	NA	3	1	NA	NA	0	0	0
Mayhem	GB-RM	F	2017	3	0	NA	NA	21/10/2019	NA	NA	3	2	NA	NA	0	0	0
Mayhem	GB-RM	F	2017	3	0	NA	NA	21/10/2019	NA	NA	3	3	NA	NA	0	0	0
