# Supplementary material for: Long-term memory for a learned behaviour in a wild bird
Source: Biol Lett. 2020 Feb 12;16(2):20190912. doi: 10.1098/rsbl.2019.0912 (PMC7058958; doi:10.1098/rsbl.2019.0912)
Supplement: R code [file rsbl20190912supp2.r]

## Code supporting:  
## Shaw RC, Harvey A. Long term memory for a learned behaviour in a wild bird. Biology Letters

# Import data
data <- read.csv("Shaw & Harvey data.csv")
data$Experience.group <- as.factor(data$Experience.group)
data$Solve <- as.factor(data$Solve)

# Loading required packages
library(lme4) # for running models
library(MuMIn) # for multimodel averaging
library(sjPlot) # for model diagnostic plots
library(dplyr) # for summarsing data frames
library(blmeco) # for checking dispersion in GLMMs
library(AER) # for checking dispersion in GLMs
library(ggplot2) # for plotting
library(cowplot) # for plotting
library(ggpubr) # for plotting

# Summarising data for naive and experienced birds

data_naive <- subset(data, Experience.group == 0) # naive birds
summary(data_naive) # all trials
data_naive1 <- subset(data_naive, Trial.no.==1)
summary(data_naive1) # trial 1

data_exp <- subset(data, Experience.group == 1) # experienced birds
summary(data_exp) # all trials
data_exp1 <- subset(data_exp, Trial.no.==1)
summary(data_exp1) # trial 1


##############################

# GLMM examining the effect of experience, sex, age and trial order on total number of pecks during each trial

fit <- glmer(Total.pecks ~ Age + Sex + Trial.no. + Experience.group + (1|Name), data = data, family = "poisson", na.action=na.fail)

dispersion_glmer(fit) # values greater than 1.4 indicate over-dispersion
r.squaredGLMM(fit)
summary(fit)
plot_model(fit, type = "re") # random effect
plot_model(fit, type = "diag") # qq plot for random effects
plot_model(fit, sort.est = T) # fixed effects estimates

ms <- dredge(fit)
avgmod <- model.avg(ms)
sw(ms) # Relative Variable Importance for each parameter
summary(avgmod)
confint(avgmod)

############################### 

# LMM examining how trial order, age, sex, and time since last solve affect the time (log transformed) to open the first lid in a trial

data2 <- na.omit(subset(data, select = c("Name", "Age", "Sex", "Trial.no.",  "Total.pecks", "Pecks.to.1st.worm", "Time.to.1st.worm", "Days.since.last.open")))

# Exclude Henry from analyses as he had only one trial
data2 <- subset(data2, Name != "Henry")

fit1 <- lmer(log(Time.to.1st.worm) ~ Days.since.last.open + Age + Sex + Trial.no. + (1|Name), data = data2, na.action=na.fail)

summary(fit1)
r.squaredGLMM(fit1)
plot_model(fit1, type = "re") # random effect
plot_model(fit1, type = "diag") # qq plot for random effects
plot_model(fit1, sort.est = T) # fixed effects estimates

ms1 <- dredge(fit1)
avgmod1 <- model.avg(ms1)
sw(ms1) # Relative Variable Importance for each parameter
summary(avgmod1)
confint(avgmod1) # Sex and trial order do not bound zero

data2.1 <- subset(data2, Name != "Georgie") # Excluding outlier (Georgie, who took 128 s to open first lid in trial 1)

fit1.1 <- lmer(log(Time.to.1st.worm) ~ Days.since.last.open + Age + Sex + Trial.no. + (1|Name), data = data2.1, na.action=na.fail)

summary(fit1.1)
r.squaredGLMM(fit1.1)
plot_model(fit1.1, type = "re") # random effect
plot_model(fit1.1, type = "diag") # qq plot for random effects
plot_model(fit1.1, sort.est = T) # fixed effects estimates

ms1.1 <- dredge(fit1.1)
avgmod1.1 <- model.avg(ms1.1)
sw(ms1.1)
summary(avgmod1.1)
confint(avgmod1.1) # Sex does not bound zero, but trial is closer to bounding zero - the trial effect in 'fit1' above is driven largely by the outlier female, Georgie.

###############################

### GLM examining how age, sex, and time since last solve affect the pecking behaviour to retrieve the first worm in trial 1 

data3 <- na.omit(subset(data, select = c("Name", "Age", "Sex", "Trial.no.",  "Total.pecks", "Pecks.to.1st.worm", "Time.to.1st.worm", "Days.since.last.open")))

data3 <- subset(data3, Trial.no. == 1)

fit3 <- glm(Pecks.to.1st.worm ~ Days.since.last.open + Age + Sex, data = data3, family = "poisson", na.action=na.fail)

dispersiontest(fit3) 
r.squaredGLMM(fit3)
summary(fit3)
plot_model(fit3)

ms3 <- dredge(fit3)
avgmod3 <- model.avg(ms3)
sw(ms3)
summary(avgmod3)
confint(avgmod3) # All terms bound zero


###

## Building figure for paper

fig_peck <- na.omit(subset(data, select = c("Experience.group", "Trial.no.", "Name", "Total.pecks")))
fig_peck <- group_by(fig_peck, Name)
fig_peck <- summarize(fig_peck, Experience = last(Experience.group), mean.pecks = mean(Total.pecks))

a <- ggboxplot(fig_peck, x = "Experience", y = "mean.pecks", 
          color = "Experience", palette = c("limegreen", "black"),
          ylab = "Mean pecks per trial", xlab = "Experience") +
          theme_classic() +
          labs(title = "A") +
          rremove("legend")
 
fig_time <- na.omit(subset(data, select = c("Sex", "Trial.no.", "Name", "Time.to.1st.worm")))   
fig_time <- subset(fig_time, Name!= "Hansel") # Exclude bird that opened lid with foot

b <- ggboxplot(fig_time, x = "Trial.no.", y = "Time.to.1st.worm", 
          color = "Sex", palette = c("#FF0000", "#0033FF"),
          ylab = "Time to 1st worm (s)", xlab = "Trial no.") +
          theme_classic() +
          labs(title = "B") +
          theme(legend.position = c(0.8, 0.8))

# Combine graphs

ggarrange(a, b)
ggsave("Figure 2.pdf")
